# Supplementary material
Source: Springer Nature journal article supplement (https://www.springermedizin.de/resource/supplementary/13550_2011_28_MOESM7_ESM.pdf/9687446)

A

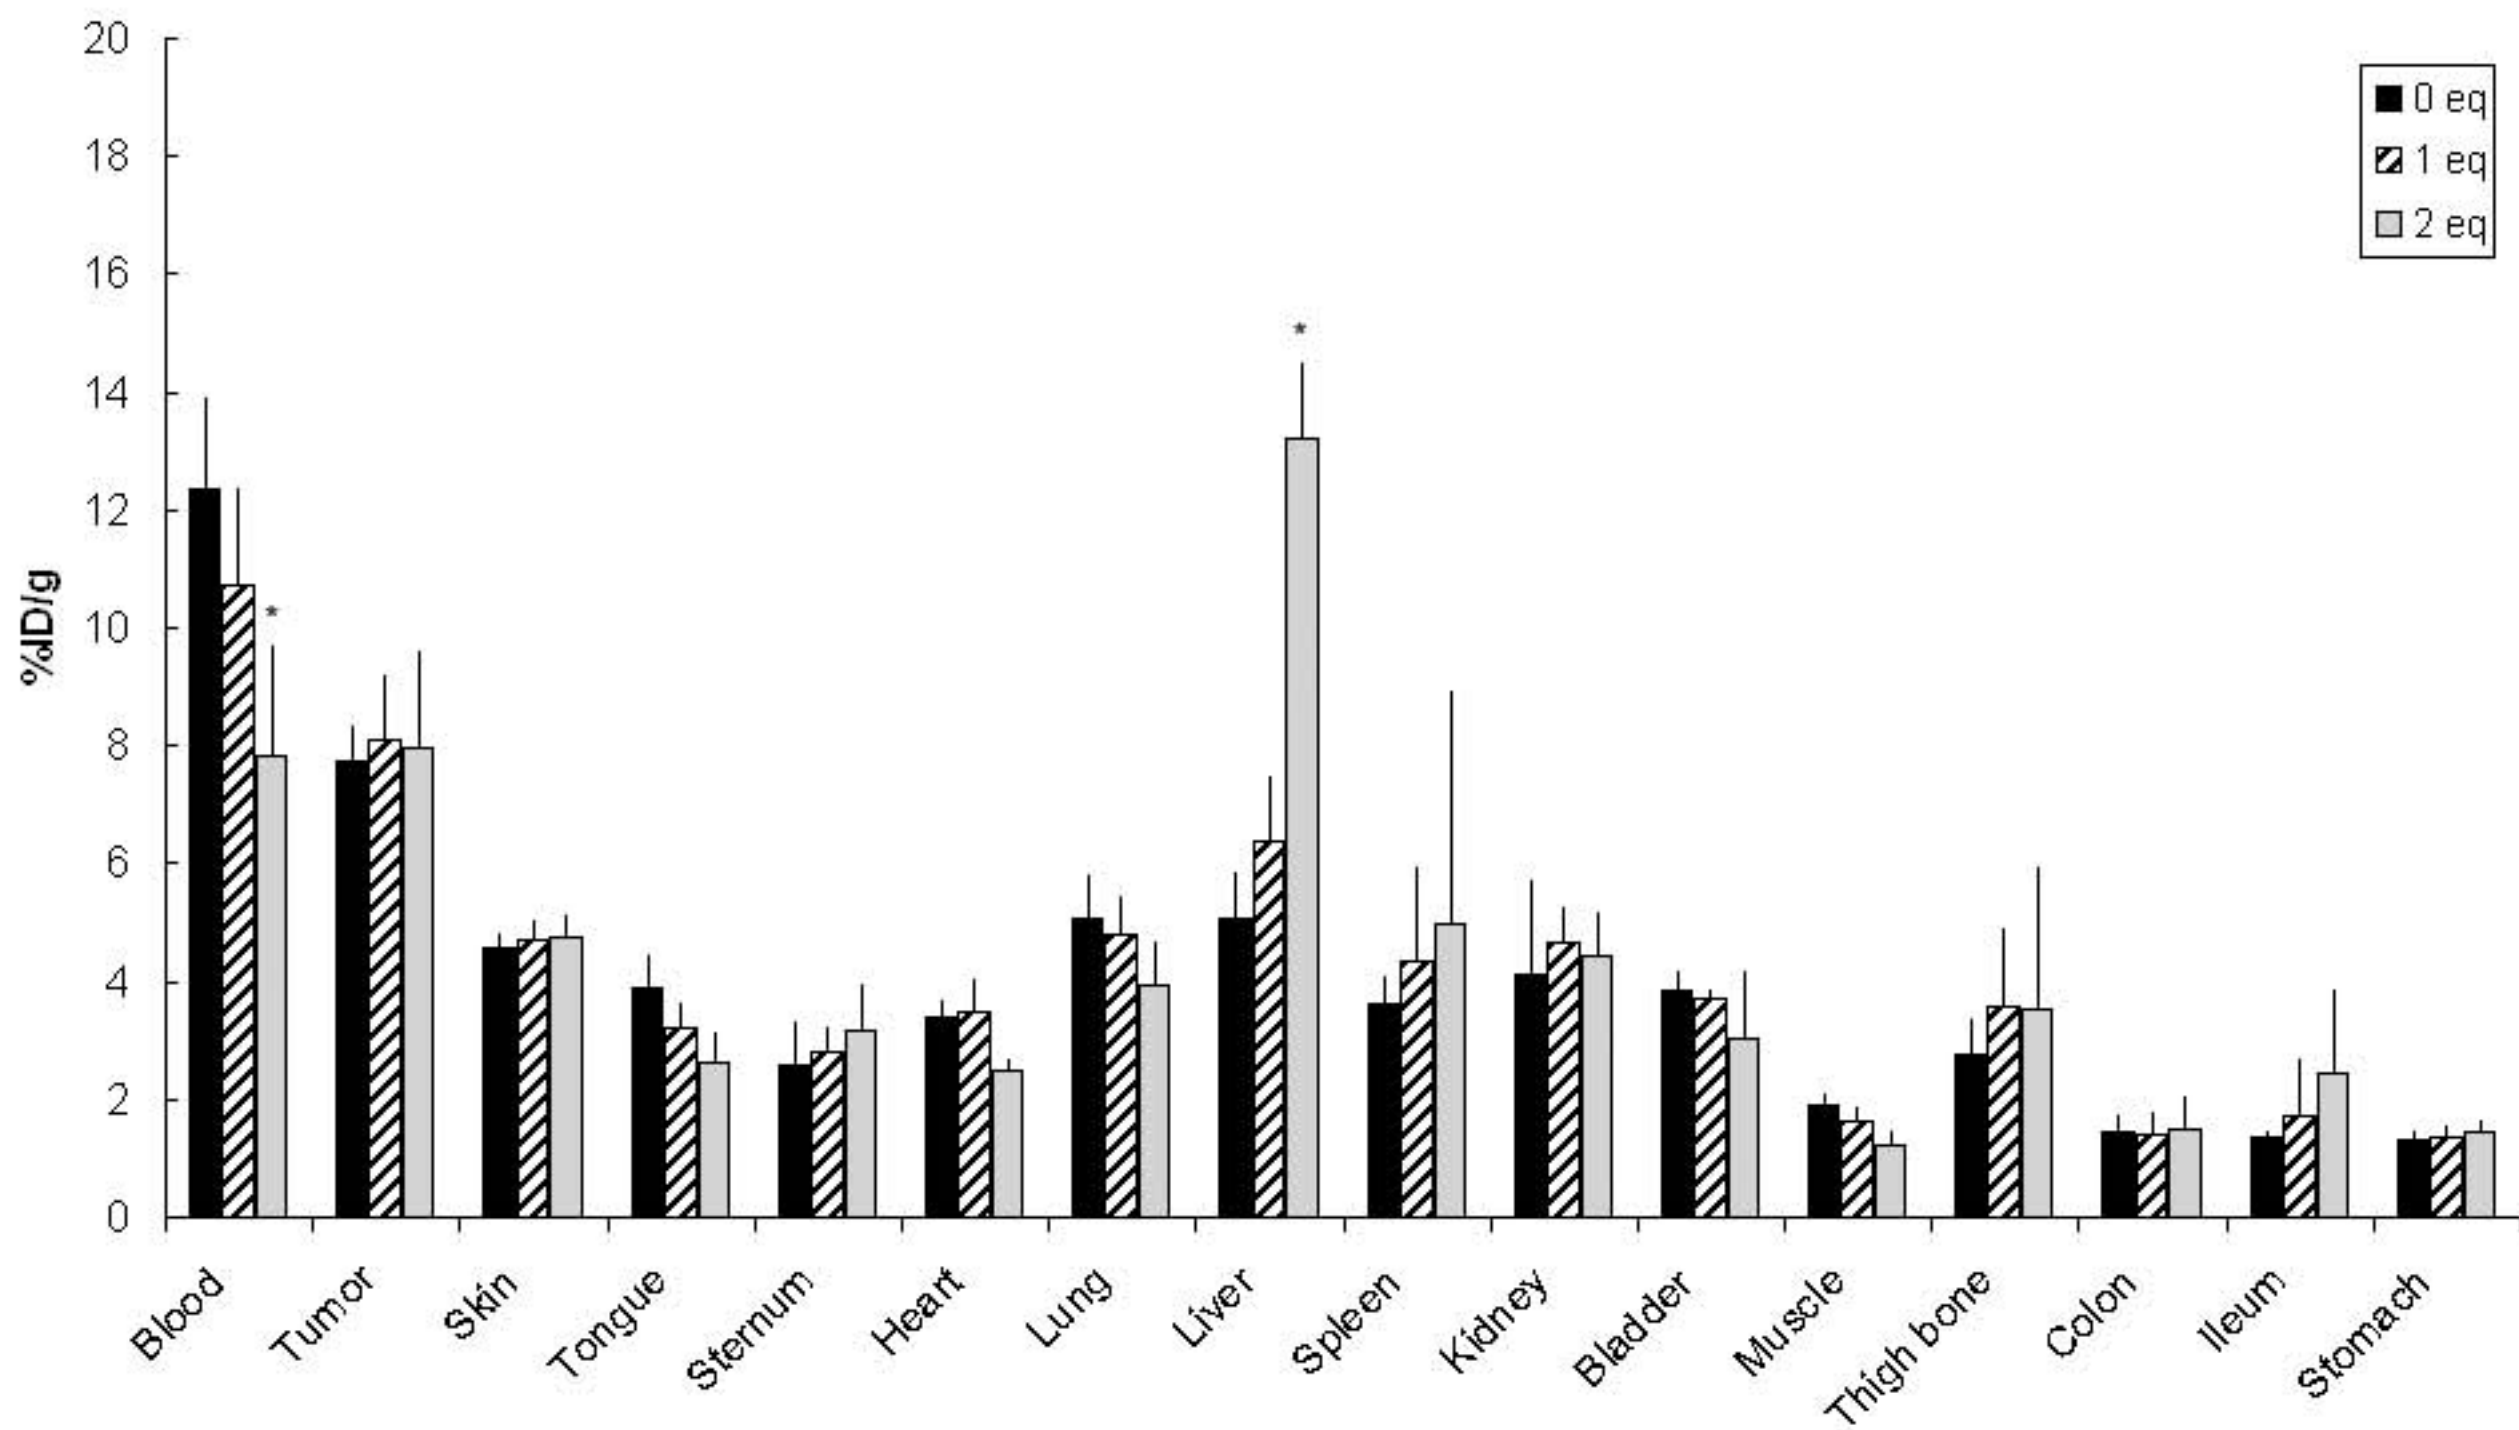

B

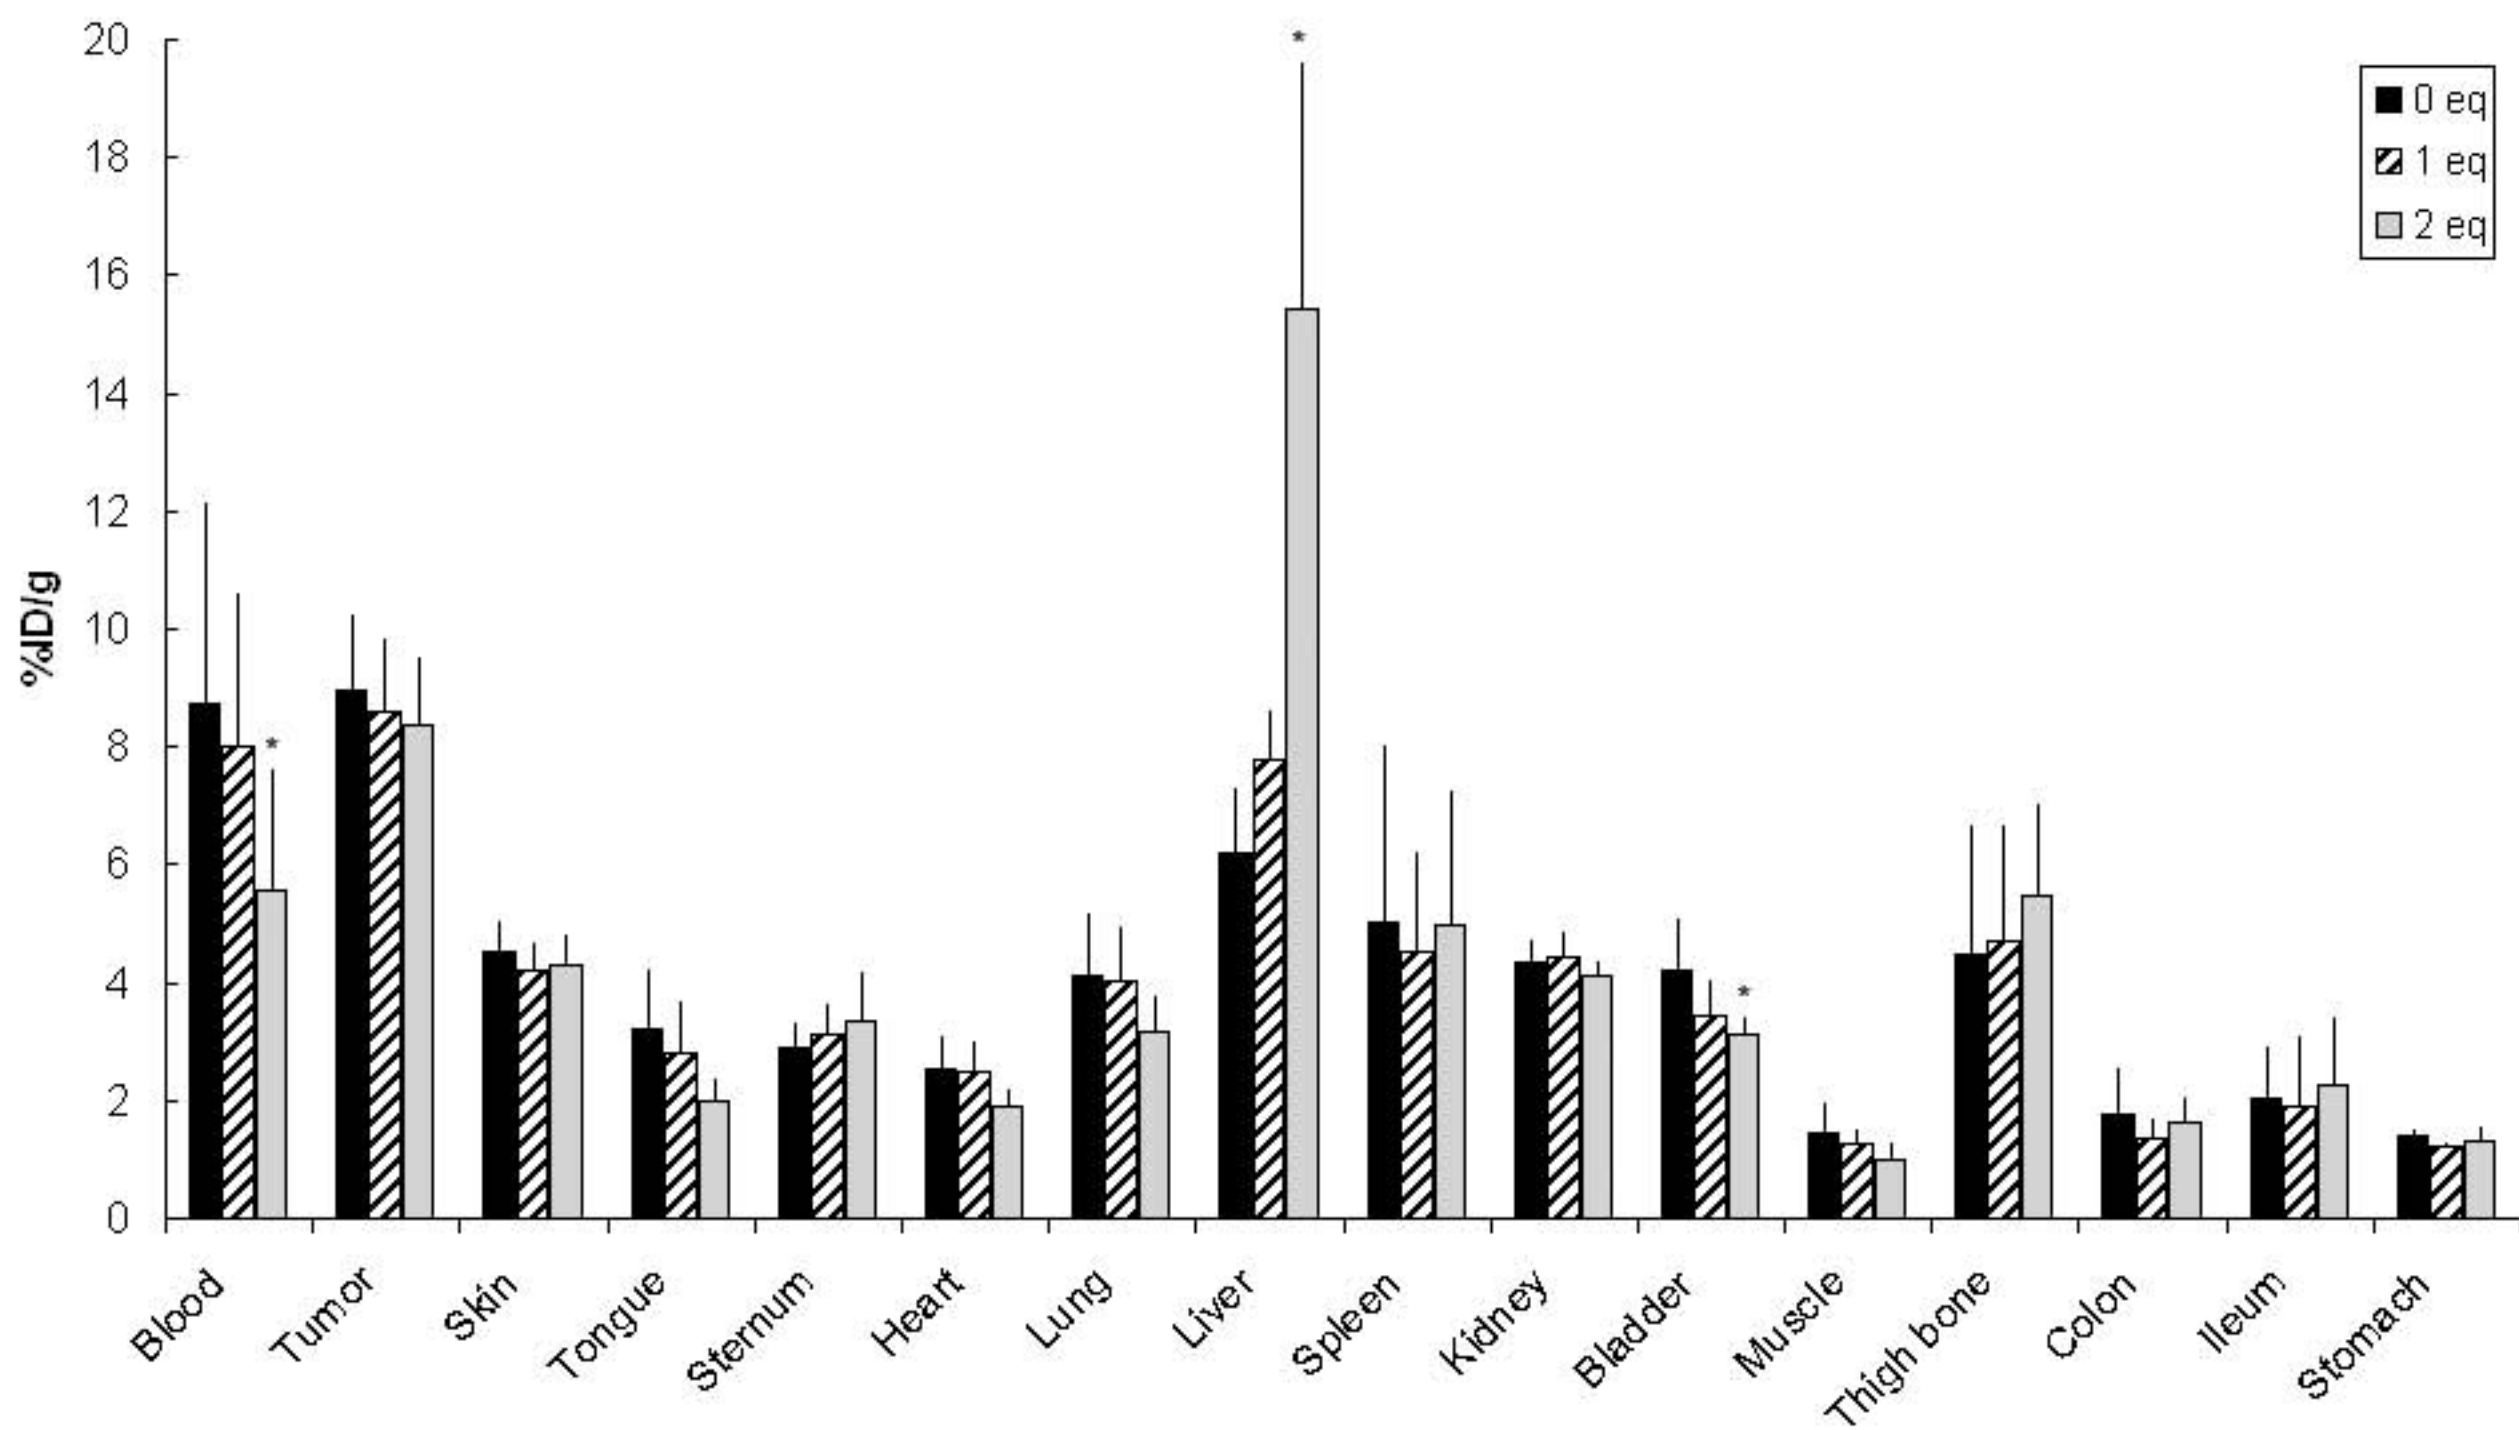

Supplement: MOESM7 [file 9687446]
